# Supplementary material for: Accurate prediction of HbA1c by continuous glucose monitoring using a kinetic model with patient-specific parameters for red blood cell lifespan and glucose uptake
Source: PubMed Central journal article supplement — Diab Vasc Dis Res. 2021 May 7;18(3):14791641211013734. doi: 10.1177/14791641211013734 (PMC8481730; doi:10.1177/14791641211013734), 2021-05-07
Supplement: sj-pdf-1-dvr-10.1177_14791641211013734.pdf [file sj-pdf-1-dvr-10.1177_14791641211013734.pdf]

## Supplemental Materials

### Kinetic constant estimation and cHbA1c calculation

Both kinetic parameter estimation and prospective cHbA1c calculations were performed with equation 8 reported previously [13].

$$A1c_z = EA_z(1 - D_z) + \sum_{i=1}^{z-1} [EA_i(1 - D_i) \prod_{j=i+1}^z D_j] + A1c_0 \prod_{j=1}^z D_j$$

Where  $D_i = e^{-(k_{gly} * g_i + k_{age})t_i}$  and  $EA_i = g_i / (k_{age} / k_{gly} + g_i)$ . The value  $A1c_z$  is equivalent to cHbA1c at the end of time interval  $t_z$ , while intra-RBC glucose level  $g_i = (K_M * G_i) / (K_M + G_i)$  depends on blood glucose level  $G_i$  and glucose binding affinity to GLUT1  $K_M = 26.2$  mM.

Estimated HbA1c (eHbA1c) and Glucose Management Indicator (GMI) were calculated from average glucose with the following regression equations:

$$GMI\% = AG_{mg/dL} * 0.02392 + 3.31$$

$$eHbA1c\% = (AG_{mg/dL} + 46.7) / 28.7$$
